# Supplementary material
Source: PubMed Central journal article supplement (PMC470742)

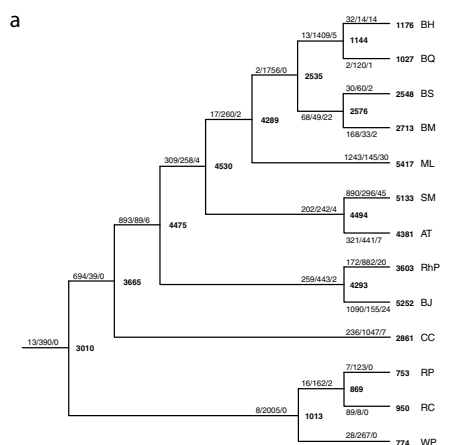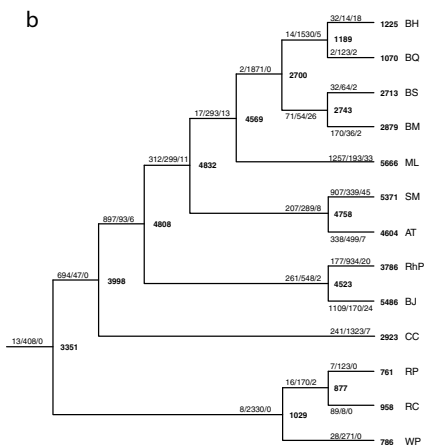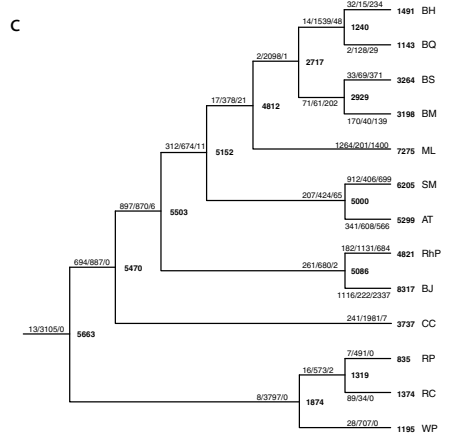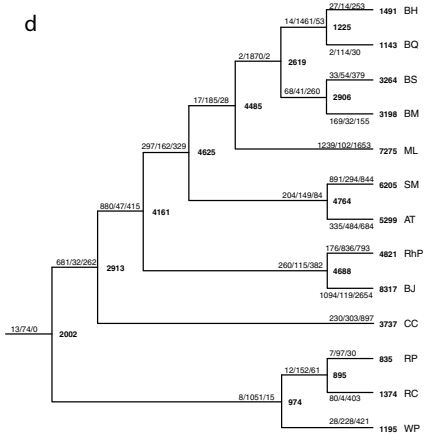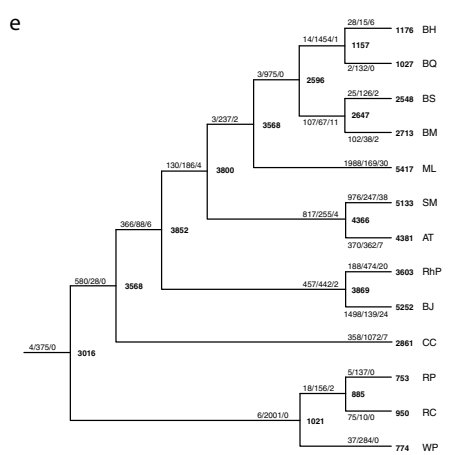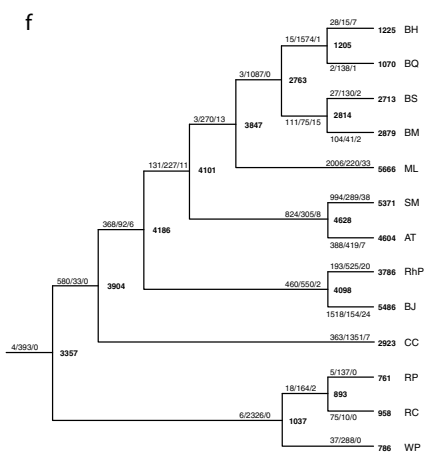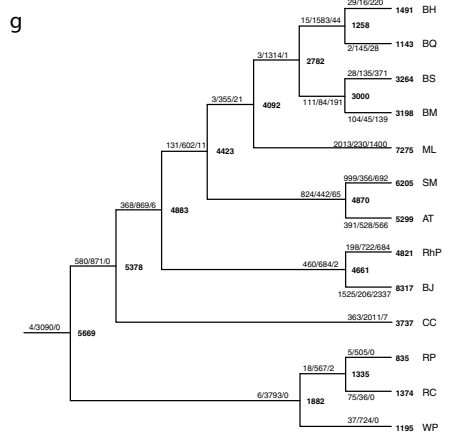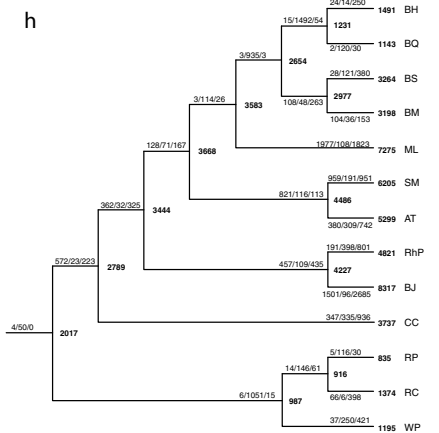

Supplement: pnas_101_26_9722__4.pdf [file pnas_101_26_9722__4.pdf]
